# Supplementary material
Source: PubMed Central journal article supplement (PMC3098123)
Supplement: NIHMS290077-supplement-1_si_001.pdf [file NIHMS290077-supplement-1_si_001.pdf]

## SUPPORTING INFORMATION

### **Kinetic Mechanism for the Excision of Hypoxanthine by *Escherichia coli* AlkA and Evidence for Binding to DNA Ends**

Boyang Zhao<sup>‡</sup> and Patrick J. O'Brien<sup>\*§</sup>

<sup>‡</sup>Department of Biomedical Engineering and <sup>§</sup>Department of Biological Chemistry, University of Michigan, Ann Arbor, Michigan 48109

†This work was supported by a grant from the National Institutes of Health to P.O. (CA122254).

\*Address correspondence to P.O. Phone: 734-647-5821. Fax: 734-764-3509. Email: pjobrien@umich.edu.

### **Index of Supporting Figures**

Figure S1. Stability of AlkA in the absence of DNA

Figure S2. Single turnover excision of Hx by AlkA

Figure S3. Single turnover excision of  $\epsilon$ A by AlkA

Figure S4. Evidence for product inhibition from long time courses

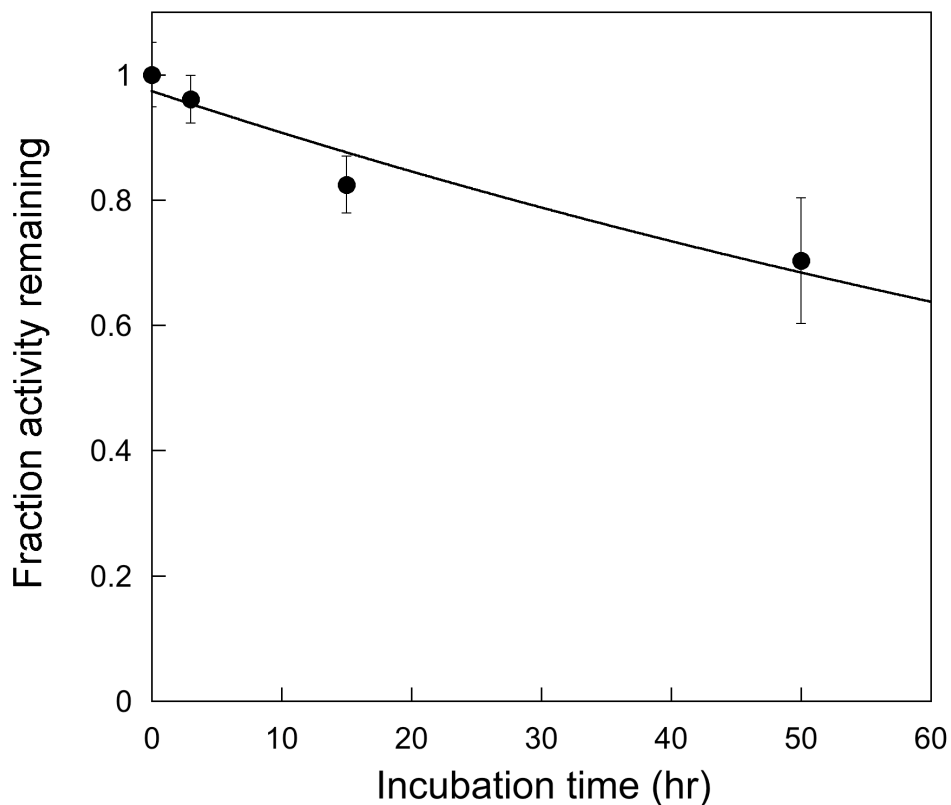

**Figure S1.** Stability of AlkA in the absence of DNA. AlkA (50 nM) was incubated for periods of up to 50 hours at pH 6.1 and 37°C. After the incubation period, multiple-turnover glycosylase activity was measured with saturating 19u I•T substrate (5  $\mu$ M). Reactions were performed in duplicate and the average and standard deviation is shown. The data were fit by a single exponential with a rate constant for inactivation of  $0.007 \pm 0.001 \text{ hr}^{-1}$ , which corresponds to a half-life of approximately 100 hours.

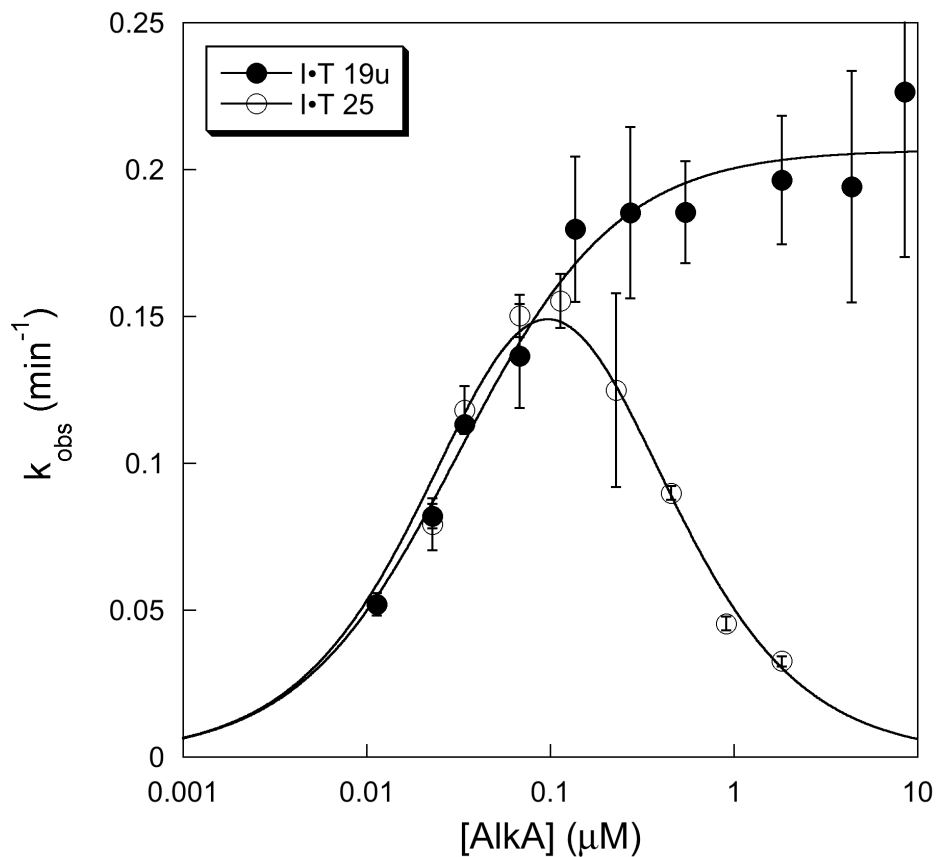

**Figure S2.** Single turnover excision of Hx by AlkA. The data for the 19u and 25mer substrates are shown from Figure 2B in the text as a semi-log plot to illustrate that the 19u substrate does not show any signs of inhibition up to 10  $\mu\text{M}$  AlkA.

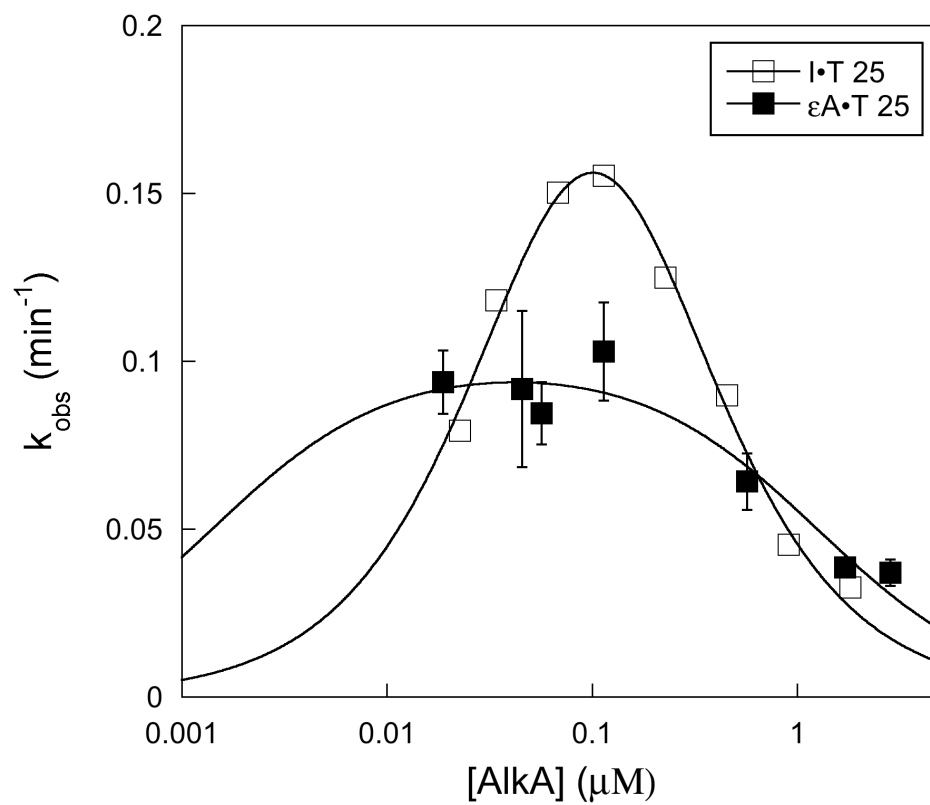

**Figure S3.** Single turnover excision of  $\epsilon A$  by AlkA. The 25mer  $\epsilon A\bullet T$  substrate is identical to the 25mer  $I\bullet T$  substrate, except the fluorescein label was attached to the 3' end (3'FAM). The data for the  $I\bullet T$  substrate is from Figure 2 in the text.

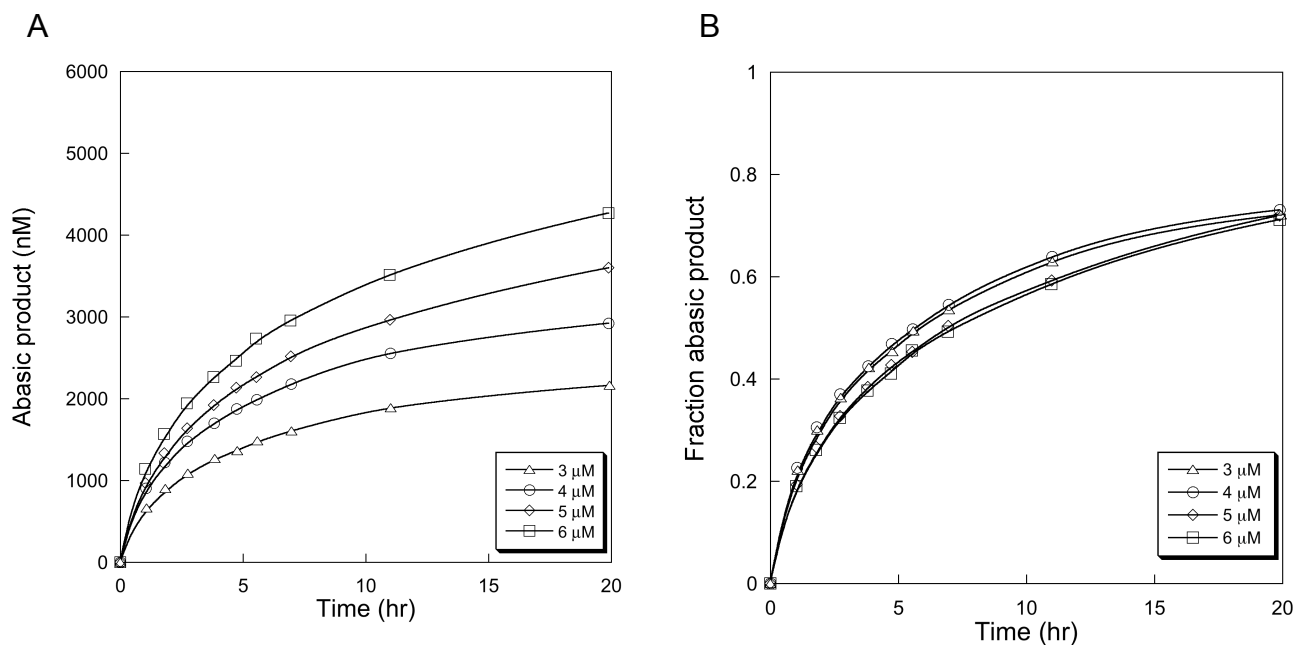

**Figure S4.** Evidence for product inhibition from long time courses. Representative reactions contained 10-fold excess of I•T 19u substrate over AlkA (see legend for substrate concentration). (A) Formation of abasic product shows significant curvature over time. Lines are not a theoretical fit to any equation, but simply drawn to facilitate comparison. (B) These data are also shown as the fraction of abasic product as a function of time. This illustrates that product inhibition is independent of the absolute concentration of substrate (or enzyme), but depends upon the ratio of product to substrate.
